1 **Impact of dominance rank specification in dyadic interaction models**

2 Mielke, Alexander<sup>1,2,3</sup>

3 1 School of Psychology and Neuroscience, University of St Andrews, UK

4 2 Primate Models for Behavioural Evolution Lab, School of Anthropology and Museum Ethnography,  
5 Oxford, UK

6 3 Taï Chimpanzee Project, Centre Suisse de Recherches Scientifiques en Côte d'Ivoire, Abidjan, Côte  
7 d'Ivoire

8

9 **Abstract**

10 Dominance rank is a vital descriptor of social dynamics in animal societies and regularly used in  
11 studies to explain observed interaction patterns. However, researchers can choose between  
12 different indices and standardizations, and can specify dyadic rank relations differently when  
13 studying interaction distributions. These researcher degrees of freedom potentially introduce biases  
14 into studies and reduce replicability. Here, I demonstrate the impact of researcher choices by  
15 comparing the performance of different combinations of rank index, standardization, and model  
16 specification when explaining dyadic interaction patterns in sooty mangabeys (*Cercocebus atys atys*).  
17 I show that while no combination consistently performed best across interaction types (aggression,  
18 grooming, proximity, supplants), model specifications allowing for non-linear patterns performed  
19 better than other models on average. Choices made in pre-processing and model building impacted  
20 model performance and subsequent interpretation of results. Researchers could end up describing  
21 social systems differently based on the same data. These results highlight the impact of researcher  
22 choices in the processing of behavioural data and potential limitations when using indirect species  
23 comparisons in animal behaviour research. To increase repeatability, researchers could make the

- 24 impact of their processing choices more transparent and report results using a variety of indices and
- 25 model specifications.

## 26 **Introduction**

27 Dominance hierarchies are one of the most conspicuous structural features of animal societies  
28 (Dugatkin & Earley, 2004). Calculating dominance hierarchies accurately, determining their linearity  
29 and temporal structure, and understanding how they influence behaviour and fitness has thus long  
30 been central to the study of animal behaviour (Drews, 1993). Dominance rank, as a measure of the  
31 way competitive advantage is distributed within a group, is used frequently as a predictor or  
32 outcome variable in models describing why animals act the way they do (Sánchez-Tójar et al., 2018).  
33 Different indices for calculating dominance hierarchies are available to researchers, with different  
34 assumptions about the nature of dominance and the underlying interaction distribution (Albers & de  
35 Vries, 2001; Bayly et al., 2006; David, 1987; Douglas et al., 2017; Goffe et al., 2016; Netto et al.,  
36 1993; Neumann et al., 2011; Vilette et al., 2019). For example, indices can assume linearity of  
37 hierarchies or not (Douglas et al., 2017), account for temporal change or not (Albers & de Vries,  
38 2001), and can weigh interaction intensity differently (Newton-Fisher, 2017). Once an index has  
39 been calculated, it can be standardised to make it more meaningful for the system under  
40 consideration, for example by creating an ordinal rank hierarchy or accounting for group size (Levy  
41 et al., 2020). Researchers want to make the correct choices when determining which values to  
42 include in their analyses; however, the large variety of solutions in circulation indicates that no  
43 optimal solution for all species and circumstances exists. The existing diversity of researcher choices  
44 poses risks to the replicability of studies (Hoffmann et al., 2021).

45 The uncertainty for researchers increases when studying the impact of dominance rank on  
46 interactions between individuals. Here, not only the individual rank is of interest; we often want to  
47 represent how the dominance ranks of both sender and receiver determine interaction patterns.  
48 Importantly, rank can influence partner choice in diverse ways: individuals can choose a partner  
49 because of the partner's rank, the simple fact that they are higher-ranking than the partner, the  
50 distance between ranks, or a non-linear interaction between their own rank and that of the partner.

51 These relationships can be captured using different specifications in statistical models: for example,  
52 we can include a fixed effect for each individual rank in a linear model, or the rank difference  
53 between them. But just as each dominance index makes assumptions about the underlying  
54 distribution of rank (Douglas et al., 2017), any decision about how individual and dyadic ranks are  
55 included in models makes assumptions about power dynamics in the group. When fitting statistical  
56 models, we decide on one way to represent power relations to describe variation in our outcome  
57 variable as accurately as possible. However, model specifications might lead researchers to different  
58 conclusions about their study system. We do not currently know the potential impact of pre-  
59 processing and analytical choices on interpretations of dyadic interaction patterns. In this study, I  
60 apply diverse ways to define dominance rank in statistical models to the same dataset of sooty  
61 mangabey (*Cercocebus atys atys*) interaction patterns to explore how differences in pre-processing  
62 and model specifications influence conclusions about the social system.

63 Researchers face two competing responsibilities to increase the credibility of their work: on one  
64 hand, they should describe the dominance structure of their study system as accurately as possible;  
65 on the other hand, their results should be replicable and comparable with the existing literature  
66 (Fraser et al., 2020). Given the variety of choices researchers can make in this context, it is easy to  
67 see that replicability between studies can suffer (Ihle et al., 2017). Currently, researcher choices are  
68 mainly hidden – readers are presented with one combination for dominance index, standardisation,  
69 and model specification. Different iterations that might have been tried in pre-processing but were  
70 not chosen might not be transparently reported (O’Dea et al., 2021), inflating the reported expected  
71 number of incorrect rejections in a frequentist framework (Lonsdorf et al., 2019; Wicherts et al.,  
72 2016). If results were conditional on researcher choices, comparing independent studies becomes  
73 strenuous. For example, when studying of infant handling in primates, ranks can be described using  
74 the rank difference between two individuals (Henzi & Barrett, 2002), ‘higher/lower-ranking than  
75 mother’ categories (Silk, 1999), or absolute rank distance (Kubenova et al., 2016). While the authors  
76 of each individual study chose their methodology with a specific hypothesis in mind, we do not know

77 whether differences between studies show species differences or reflect analytical choices. Certain  
78 model specifications might also limit possible interpretations: for example, using absolute rank  
79 distance assumes symmetrical effects and precludes different effects for high- and low-ranking  
80 group members. A researcher designing a new study on the same subject would have to decide  
81 which approach to replicate, and why.

82 While presenting the impact of different choices in this article, I argue for transparent and open  
83 reporting of different analytical pathways using a ‘multiverse analysis’ approach for future studies  
84 (Hoffmann et al., 2021; Steegen et al., 2016). Rather than choosing one rank  
85 index/standardization/model specification combination (e.g., proportional Elo index entered as main  
86 effects), researchers could consider calculating and reporting all possible combinations, to show that  
87 their interpretation is not conditional on the choices they made (Lonsdorf et al., 2019). This  
88 transparent approach has been highlighted as a viable strategy to handle the uncertainty arising  
89 from researcher degrees of freedom in the scientific process when multiple analytical choices are  
90 available (Hoffmann et al., 2021): as uncertainty cannot be removed, an honest approach can  
91 counter selective reporting and increase comparability across studies. As data pre-processing and  
92 analysis pipelines become more accessible with open data and scripts, including multiple results to  
93 rule out conditionality of interpretations on researcher degrees of freedom becomes increasingly  
94 feasible.

95 In this study, I compare the impact of different processing steps on the analysis of dyadic interaction  
96 rates, by varying dominance indices, index standardisation, and model specification. Optimally,  
97 these factors would have little influence, and choices along the data analysis pipeline would  
98 minimally affect results and interpretations (O’Dea et al., 2021). However, the hypothesis for this  
99 article is that different model specifications considerably influence model fit and interpretation  
100 across different social interaction types (aggressions, spatial proximity, feeding supplants,  
101 grooming). Recent studies (Balasubramaniam et al., 2013; Bayly et al., 2006; Douglas et al., 2017;

102 Gammell et al., 2003; Goffe et al., 2018; Newton-Fisher, 2017; Vilette et al., 2019) have compared  
103 and/or improved several dominance rank indices. Here, I focus on two commonly used dominance  
104 indices – David’s Score (David, 1987) and (optimised) Elo rating (Foerster et al., 2016) to test  
105 whether this choice influences results. I compared different standardizations (raw index values,  
106 proportional ranks, ordinal ranks) because this choice has recently been shown to influence model  
107 outcomes in primate studies (Levy et al., 2020; Schino & Lasio, 2019), but insufficient information  
108 still exists on whether and how they influence models that represent interaction rates between  
109 dyads of individuals within groups. My focus lies on how the power relations between the individuals  
110 in a dyad are represented when fitting models, given that no systematic information on the impact  
111 of this choice is currently available. My prediction is that different model specifications of rank  
112 differences vary in their prediction error of real-world primate data and lead to different  
113 interpretations of the impact of dominance rank on social interactions.

114

## 115 **Methods**

### 116 *Data Set*

117 I used data collected on adult female sooty mangabey social interactions in Tai Forest National Park,  
118 Cote d’Ivoire, by trained field assistants and me between January 2014 and June 2017 as part of the  
119 ongoing long-term data collection for the Tai Chimpanzee Project (Gba et al., 2019; Mielke et al.,  
120 2017, 2018, 2020). I selected three 1-year blocks of data on aggression (n = 1759 events), feeding  
121 supplants (n = 1218 events), grooming (n = 3252 events), and spatial proximity within 1m (n = 4867  
122 events) for all adult females (above 4.5 years) present in the group for the entirety of each block  
123 (total: 25 females; range: 17-18 females per block). I only use adult females, as their hierarchies are  
124 clearly linear (Range & Noë, 2002) and they interact at relatively high rates, while the connection  
125 between male and female hierarchies is less clear and males interact at low rates in this group  
126 (Mielke et al., 2017). For each possible combination of sender and receiver, I determined the

127 number of interactions displayed from one to the other. We previously showed that the aggression  
128 and supplant data are internally consistent and therefore probably have low measurement error  
129 (Mielke et al., 2021). For the grooming and proximity distributions internal consistency is lower,  
130 because of low partner selectivity, the considerable number of dyads, and the relatively random  
131 distribution of proximity in this group of mangabeys (Mielke et al., 2020). For both grooming  
132 (Fruteau et al., 2011; Mielke et al., 2018; Range & Noë, 2002) and proximity (Mielke et al., 2020;  
133 Range & Noë, 2002), dominance rank has been shown to affect sooty mangabey behaviour. For the  
134 models below, the outcome variables are the number of aggression events from sender to receiver;  
135 number of supplant events from sender to receiver; minutes of grooming from sender to receiver;  
136 and occurrences of proximity within 1m between sender and receiver. In all models, offset terms  
137 were used to account for observation effort. I did not differentiate between different intensities of  
138 aggression. Proximity, in contrast to the other interaction types, was symmetrical, as no 'sender' and  
139 'receiver' could be defined.

140

#### 141 *Dominance Indices*

142 I calculated dominance rank using two different metrics: normalized David's Score (David, 1987; De  
143 Vries et al., 2006) and optimized Elo ratings (Foerster et al., 2016). I chose the latter over Elo ratings  
144 without optimized k and start values as we did not observe any active rank changes between  
145 females over the course of this study (Mielke et al., 2017); thus, all changes in an individual's rank  
146 are due to demographic processes (individuals dying or coming of age). The optimised k value for the  
147 Elo ratings was therefore confirmed and calculated as 0 for all year blocks. The Elo value at the first  
148 day of the year was chosen to represent the dominance hierarchy. Dominance hierarchies were  
149 computed using directional feeding displacements ('supplants'), which are highly linear in this group,  
150 with only 18 out of 1218 supplants (or 0.8%) going against the established hierarchy. Normalized  
151 David's Scores were calculated using the 'steepness' package in R (Leiva & De Vries, 2014). Elo

152 ratings were calculated using the ‘Model 3’ script provided by Foerster et al. 2016. Both indices  
153 assume linearity of hierarchy, which was given in the female mangabeys. For both normalized  
154 David’s Scores and Elo ratings, I applied different standardisations: the raw values, the ordinal  
155 hierarchy based on the raw values (highest-ranking individual has rank 1, second highest has rank 2  
156 etc.), and the proportional rank standardised between 0 and 1, with 1 being the highest-ranking  
157 individual (Levy et al., 2020). Ordinal and proportional ranks assume equidistance of ranks.

158

### 159 *Model Specifications*

160 Here, I focus on six ways of representing two rank terms in statistical models of dyadic interactions,  
161 all of which have been used for animal behaviour research (Table 1). I only used numerical  
162 representations of dominance rank – categorical representations (e.g., ‘high/medium/low’) are still  
163 in use (Rosati et al., 2020) but reduce information and add even further researcher degrees of  
164 freedom (e.g., about the number of categories and cut-offs). All models include the sender rank as a  
165 main effect. *Main Effects model*: I included both ranks as main effects, which informs us about the  
166 variation in partner choice due to whether the sender is high or low in rank and the receiver is high  
167 or low in rank but does not represent the relation between the two. *Factor Higher-ranking*: I fitted a  
168 model using a factorial term defined by whether the sender was higher- or lower-ranking than the  
169 receiver (based on the raw Elo index), which captures one simple aspect of their relationship but  
170 omits the rank distance and the actual receiver rank. *Rank Difference*: I fitted a model with a rank  
171 difference term (subtracting the receiver rank from the sender rank), which is positive if the sender  
172 outranks the receiver but also captures information on the distance between them. *Absolute Rank*  
173 *Difference*: The rank difference term cannot be fitted in interaction with the sender rank because the  
174 two are tightly bound to each other – how much higher or lower in rank an individual can be overall  
175 is determined by the sender rank. In contrast, the absolute rank distance term is small when  
176 individuals are close in rank, and large if they are far apart, but omits information about whether the



177 receiver outranks the sender. *Interaction*: I fitted one model representing the interaction term  
 178 between the sender and receiver ranks. The statistical interaction between the two rank variables  
 179 can represent both the direct impact of sender and receiver rank but can also account for  
 180 differences in partner choice between high - and low-ranking senders, as long as these are linear: for  
 181 example, high-ranking senders can supplant all group members, while low-ranking senders can  
 182 supplant only low-ranking group members. *Squared Interaction*: Lastly, I fitted a model including the  
 183 interaction of the sender rank with the squared term for the partner rank. This model can capture  
 184 the main effects of both ranks, and identify linear interaction effects, but should also be able to  
 185 represent nonlinear partner choice, for example if both high- and low-ranking group members  
 186 preferably groom individuals who are close in rank. In the following, I use all the model terms  
 187 defined in Table 1 to describe the distribution of social interactions in sooty mangabeys to  
 188 determine which of these captures most of the variation in observed patterns.

189 *Table 1: Different model specifications for rank in dyadic interaction models tested in this study. +*  
 190 *indicates that main effects were entered independently in the model, \* indicates a statistical*  
 191 *interaction term.*

| Model Name                      | Model Terms                                    | Information about                                                            |
|---------------------------------|------------------------------------------------|------------------------------------------------------------------------------|
| <i>Main Effects</i>             | Rank Sender + Rank Receiver                    | Rank Position Sender, Rank Position Receiver                                 |
| <i>Factor Higher-ranking</i>    | Rank Sender + Higher-ranking yes/no            | Rank Position Sender, Does the Sender outrank the Receiver?                  |
| <i>Rank Difference</i>          | Rank Sender + (Rank Sender – Rank Receiver)    | Rank Position Sender, Rank Position Receiver, Distance in Rank               |
| <i>Absolute Rank Difference</i> | Rank Sender * Abs(Rank Sender – Rank Receiver) | Rank Position Sender, Distance in Rank                                       |
| <i>Interaction</i>              | Rank Sender * Rank Receiver                    | Rank Position Sender, Rank Position Receiver, Linear Connection between them |
| <i>Squared Interaction</i>      | Rank Sender * (Rank                            | Rank Position Sender, Rank Position Receiver,                                |

Receiver)<sup>2</sup>

Nonlinear connection between them

---

192

193 *Models*

194 I tested how different scores (modified Elo ratings, David Scores), standardisation (raw, standardised  
195 0-1, ordinal ranks) and model specifications (main effects, factor higher/lower ranking, rank  
196 difference, absolute rank difference, interaction term, squared interaction term) influence  
197 distribution of interactions in sooty mangabeys. The response variables were, respectively,  
198 aggression events, supplant events, proximity events, and minutes of grooming. For each year, the  
199 dataset contained each sender-receiver combination and the number of interactions observed  
200 between them in that period – i.e., each sender-receiver combination is present in the dataset up to  
201 three times (once per year), and each individual is included as sender and receiver for each year with  
202 each possible partner. I did not control for any other variables (e.g., age). All rank variables were z-  
203 standardised before being entered into the models (Schielzeth, 2010). All models were fitted using  
204 Bayesian generalized linear mixed models in the ‘brms’ package (Bürkner, 2018) in R v4.1.2 (R  
205 Development Core Team & R Core Team, 2020). For the aggression and supplant model, I used zero-  
206 inflated Poisson error structure, as a large number of dyads had no recorded interactions for each  
207 type. For proximity, I fitted the model using Poisson error structure. For grooming, the most  
208 appropriate error structure was determined to be zero-inflated negative binomial. All models  
209 contained the log-transformed observation effort in hours as offset term.

210 Models were fitted using 3000 iterations on three chains. For all fixed effects in all models, I used  
211 weakly informative, normally distributed priors (Lemoine, 2019) with a mean of 0 and a standard  
212 deviation of 1. All models contained the year, sender identity, and receiver identity as random  
213 effects. Model performance was evaluated and compared using the leave-one out cross validation  
214 information criterion as available in the ‘loo’ package (Vehtari et al., 2017), as a measure of  
215 prediction error of the model posterior distribution. My assumption here is that, given that the

216 outcome remains constant, the model with the smallest LOO-IC predicts the outcome most  
217 accurately. All models within a social interaction type were compared against each other, and I  
218 report the difference between the LOO-IC of each model with the best model in the set (deltaLOO);  
219 the best model therefore has a deltaLOO of 0. I report Bayesian R<sup>2</sup> values for the best model to give  
220 a sense of explained variance (Gelman et al., 2019). I also report the interpretation researchers  
221 would have arrived at using the fixed effect results of each of the models, to demonstrate that these  
222 choices matter for the publication process. Effects were interpreted as meaningful if the 95%  
223 credible interval of the posterior distribution did not include 0, and plots were used to establish the  
224 direction of effects.

225

## 226 **Results**

### 227 *Aggression*

228 Comparing all models for the distribution of aggression interactions in the group, the simple factor  
229 describing whether the sender was higher- or lower-ranking than the receiver had the highest  
230 prediction accuracy (Fig. 1). This is explained by the distribution of zeros – lower-ranking individuals  
231 almost never attack higher-ranking individuals in this group. The explained variance of the best  
232 model for aggression was  $R^2 = 0.53$ . Of the other models, everything else being equal, the Elo-based  
233 models on average outperformed the David's Score based models (Fig. 1A). The proportional and  
234 ordinal standardizations did not show consistent differences, but both outperformed the raw values  
235 (Fig. 1B). All these differences were minor compared to the impact of the model specification (Fig.  
236 1C). Models that can represent non-linear rank distances, especially the squared interaction and  
237 interaction models, but also the model including absolute rank distance, performed considerably  
238 better than those using only main effects or the rank difference. This would considerably affect  
239 interpretations of results (Table 2): Most well-performing models found that high-ranking senders  
240 showed more aggression, low-ranking receivers were victims more often, and that this created a

241 situation where aggression was directed down the hierarchy but preferentially against closely  
242 ranked group members. The model using only main effects, modelling only whether either individual  
243 was high- or low-ranking, failed to capture these dynamics. The higher/lower rank factor and the  
244 rank difference models would have captured the down-the-hierarchy aspect, implying that all  
245 individuals indiscriminately attack lower-ranking group members. The absolute rank distance would  
246 have captured the increased aggression towards closely ranked group members but would indicate  
247 that this effect was distributed evenly for high- and low-ranking senders. The interaction and  
248 squared interaction models allowed for more complex interpretations and different patterns at  
249 different points in the hierarchy, but interpretations were also more ambiguous based on plots  
250 alone. Here, it seemed that low-ranking individuals receive more aggression because they are  
251 victims both of other low-ranking and high-ranking individuals, while low-ranking never attack high-  
252 ranking individuals.

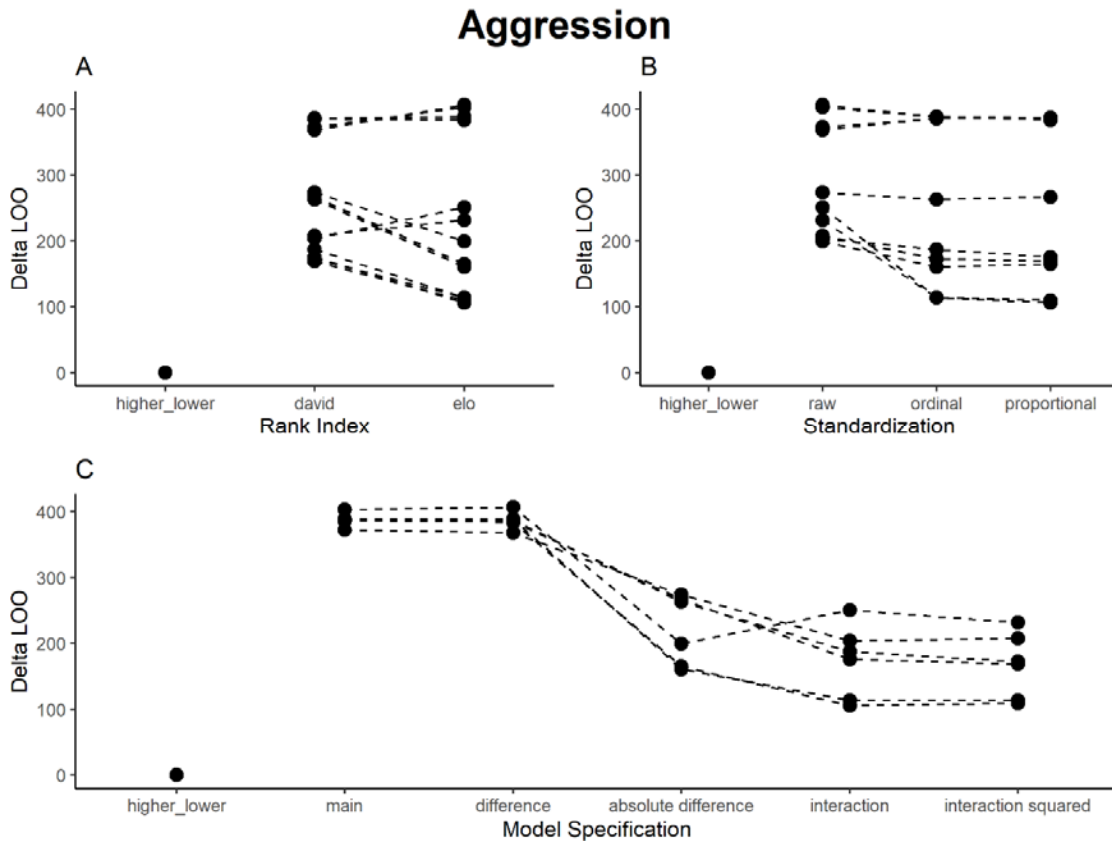

253

254 *Figure 1: Results of model comparison for Aggression interactions. The y-axis portrays delta LOO-ICs (distance to best*  
 255 *model) - the best model is therefore set to 0, and higher scores indicate poorer performance. Points indicate models (split by*  
 256 *the respective category), while lines connect otherwise comparable models (e.g., the main effects ordinal scale models for*  
 257 *both Elo ratings and David's Scores).*

258

259 *Table 2: Interpretation of Elo results for Aggression. Model interpretations are displayed for all*  
 260 *models using Elo ratings only to facilitate interpretation. Downwards arrows indicate that lower-*  
 261 *ranking individuals show higher rates, upward arrows indicates that higher-ranking individuals show*  
 262 *higher rates. Interactions can show Down The Hierarchy (DTH; Targeting lower-ranking individuals),*  
 263 *Closely-Ranked Receiver (CRR; Targeting individuals with similar rank); Up The Hierarchy (UTH;*  
 264 *Targeting higher-ranking individuals), or a mix of those.*

| Model                        | Standardization | DeltaLOO | Sender Rank | Receiver Rank | Interaction |
|------------------------------|-----------------|----------|-------------|---------------|-------------|
| <i>Factor Higher-ranking</i> | -               | 0        | ↓           | -             | DTH         |
| <i>Main Effects</i>          | Raw             | 403.3    | ↑           | -             | -           |
|                              | Ordinal         | 388.6    | -           | ↑             | -           |
|                              | Proportional    | 387.5    | -           | ↑             | -           |
| <i>Rank Difference</i>       | Raw             | 407.0    | ↑           | -             | -           |
|                              | Ordinal         | 388.7    | -           | -             | DTH         |
|                              | Proportional    | 383.9    | -           | -             | DTH         |

|                                 |              |       |   |   |                                                |
|---------------------------------|--------------|-------|---|---|------------------------------------------------|
| <i>Absolute Rank Difference</i> | Raw          | 199.8 | ↑ | - | CRR (especially high-ranking sender)           |
|                                 | Ordinal      | 160.4 | ↑ | - | CRR (especially high-ranking sender)           |
|                                 | Proportional | 165.4 | ↑ | - | CRR (especially high-ranking sender)           |
| <i>Interaction</i>              | Raw          | 250.8 | ↑ | ↓ | High-ranking: CRR and DTH;<br>Low-ranking: CRR |
|                                 | Ordinal      | 101.8 | ↑ | ↓ | High-ranking: CRR and DTH;<br>Low-ranking: CRR |
|                                 | Proportional | 106.4 | ↑ | ↓ | High-ranking: CRR and DTH;<br>Low-ranking: CRR |
| <i>Squared Interaction</i>      | Raw          | 232.0 | - | ↓ | High-ranking: CRR and DTH;<br>Low-ranking: CRR |
|                                 | Ordinal      | 106.4 | - | ↓ | High-ranking: CRR and DTH;<br>Low-ranking: CRR |
|                                 | Proportional | 109.7 | - | ↓ | High-ranking: CRR and DTH;<br>Low-ranking: CRR |

265

## 266 *Grooming*

267 For grooming, models using Elo ratings generally performed better than those using David's Scores  
 268 (Fig. 2A), and again raw values performed worse than both ordinal and proportional values (Fig. 2B).  
 269 The best models (with small differences between them) were those that could quantify closeness in  
 270 rank (Fig. 2C): the absolute rank difference (both proportional and ordinal) and the (squared)  
 271 interaction terms. The explained variance of the best model for grooming was  $R^2 = 0.19$ . Main  
 272 effects models, the higher/lower factor, and the rank distance consistently performed worse than  
 273 other models. Again, using different models would have led to different interpretations. The  
 274 consensus was that there was a tendency to groom individuals who are close in rank and that lower-  
 275 ranking individuals additionally groomed up the hierarchy (Table 3). Main effects models, rank  
 276 distance, and the higher/lower factor model showed that high-ranking individuals received more  
 277 grooming, indicating that grooming went up the hierarchy. The other models (absolute rank  
 278 difference, interaction and squared interaction models) indicated grooming of those close in rank,  
 279 with the squared interaction model also indicating that low-ranking individuals sent more grooming  
 280 and preferred higher-ranking partners.

281

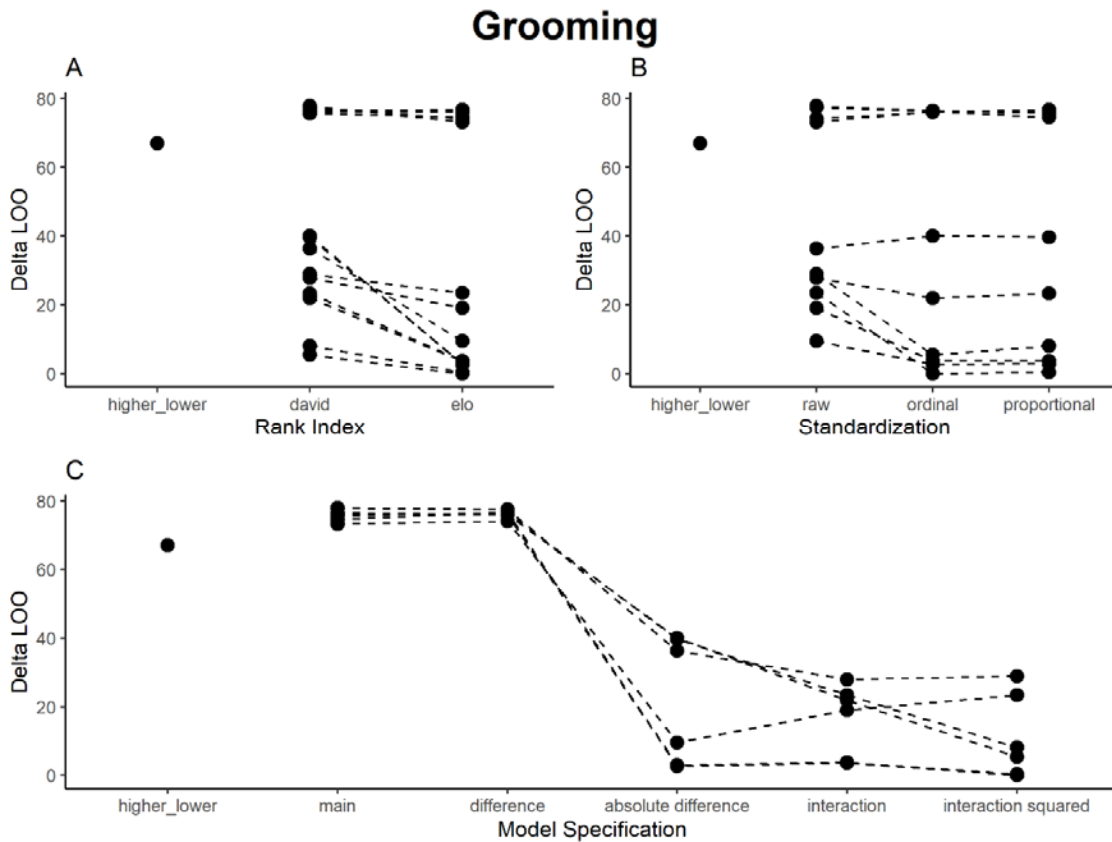

282

283 *Figure 2: Results of model comparison for Grooming interactions. The y-axis portrays delta LOO-ICs (distance to best model)*  
 284 *- the best model is therefore set to 0, and higher scores indicate poorer performance. Points indicate models (split by the*  
 285 *respective category), while lines connect otherwise comparable models (e.g., the main effects ordinal scale models for both*  
 286 *Elo ratings and David's Scores).*

287

288 *Table 3: Interpretation of Elo results for Grooming. Model interpretations are displayed for all models*  
 289 *using Elo ratings (similar results for David's Scores). Downward arrows indicates that lower-ranking*  
 290 *individuals show higher rates, upward arrows indicates that higher-ranking individuals show higher*  
 291 *rates. Interactions can show Down The Hierarchy (DTH; Targeting lower-ranking individuals), Closely-*  
 292 *Ranked Receiver (CRR; Targeting individuals with similar rank); Up The Hierarchy (UTH; Targeting*  
 293 *higher-ranking individuals), or a mix of those.*

| Model                        | Standardization | DeltaLOO | Sender Rank | Receiver Rank | Interaction |
|------------------------------|-----------------|----------|-------------|---------------|-------------|
| <i>Factor Higher-ranking</i> | -               | 67.4     | -           | -             | UTH         |
| <i>Main Effects</i>          | Raw             | 72.8     | -           | ↑             | -           |
|                              | Ordinal         | 75.8     | -           | ↑             | -           |
|                              | Proportional    | 74.2     | -           | ↑             | -           |
| <i>Rank Difference</i>       | Raw             | 73.7     | -           | -             | UTH         |

|                                 |              |      |   |   |                                             |
|---------------------------------|--------------|------|---|---|---------------------------------------------|
|                                 | Ordinal      | 76.0 | - | - | UTH                                         |
|                                 | Proportional | 76.3 | - | - | UTH                                         |
| <i>Absolute Rank Difference</i> | Raw          | 9.2  | - | - | CRR                                         |
|                                 | Ordinal      | 2.6  | - | - | CRR                                         |
|                                 | Proportional | 2.5  | - | - | CRR                                         |
| <i>Interaction</i>              | Raw          | 18.6 | - | - | CRR                                         |
|                                 | Ordinal      | 8.9  | - | - | CRR                                         |
|                                 | Proportional | 3.4  | - | - | CRR                                         |
| <i>Squared Interaction</i>      | Raw          | 23.1 | ↓ | ↑ | High-ranking: CRR; Low-ranking: CRR and UTH |
|                                 | Ordinal      | 7.1  | ↓ | ↑ | High-ranking: CRR; Low-ranking: CRR and UTH |
|                                 | Proportional | 0    | ↓ | ↑ | High-ranking: CRR; Low-ranking: CRR and UTH |

294

295 *Proximity*

296 The proximity data were symmetrical ( $A \rightarrow B \Rightarrow B \rightarrow A$ ), allowing us to test how models cope with  
 297 this additional oddity in the data. For proximity, models using David's Scores and Elo ratings  
 298 performed roughly similar, with a slight advantage for the latter (Fig. 3A), and again raw values  
 299 performed worse than proportional values, which in turned performed worse than ordinal values  
 300 (Fig. 3B). In fact, across models, raw values detected different patterns than the two  
 301 standardizations (Table 4), and anyone basing their interpretation on those results would describe a  
 302 different social system. In raw values, the sender and receiver main effects both had a strong  
 303 positive effect (high-ranking senders and receivers show higher levels of proximity), while for both  
 304 standardizations, the two main effects had strong negative effects. The raw value models indicated a  
 305 preference for closely ranked partners for proximity across sender ranks, while the other models  
 306 indicated a preference for closely-ranked partners in low- and medium-ranking individuals, while  
 307 high-ranking individuals showed no clear preference. This might be because I removed males from  
 308 the analysis. The different result for raw values is concerning, given the raw values were highly  
 309 correlated ( $>0.9$ ) with both standardizations across indices. Given the inferior performance of the  
 310 raw values in the model comparison, these models likely fail to predict the actual group patterns,  
 311 but this would not be apparent to a researcher focusing exclusively on these values. The best model



312 to detect proximity was the squared interaction model for the ordinal Elo ratings (explained  
 313 variance:  $R^2 = 0.60$ ), followed by the same model for David's Scores (Fig. 3C). Main effects, rank  
 314 distance, and the higher/lower factor again performed poorly in general – not surprisingly, given  
 315 that the proximity data were symmetrical. Despite the symmetry, the higher/lower factor and rank  
 316 difference would have indicated directional effects. The absolute difference also performed worse  
 317 than the interaction models.

318

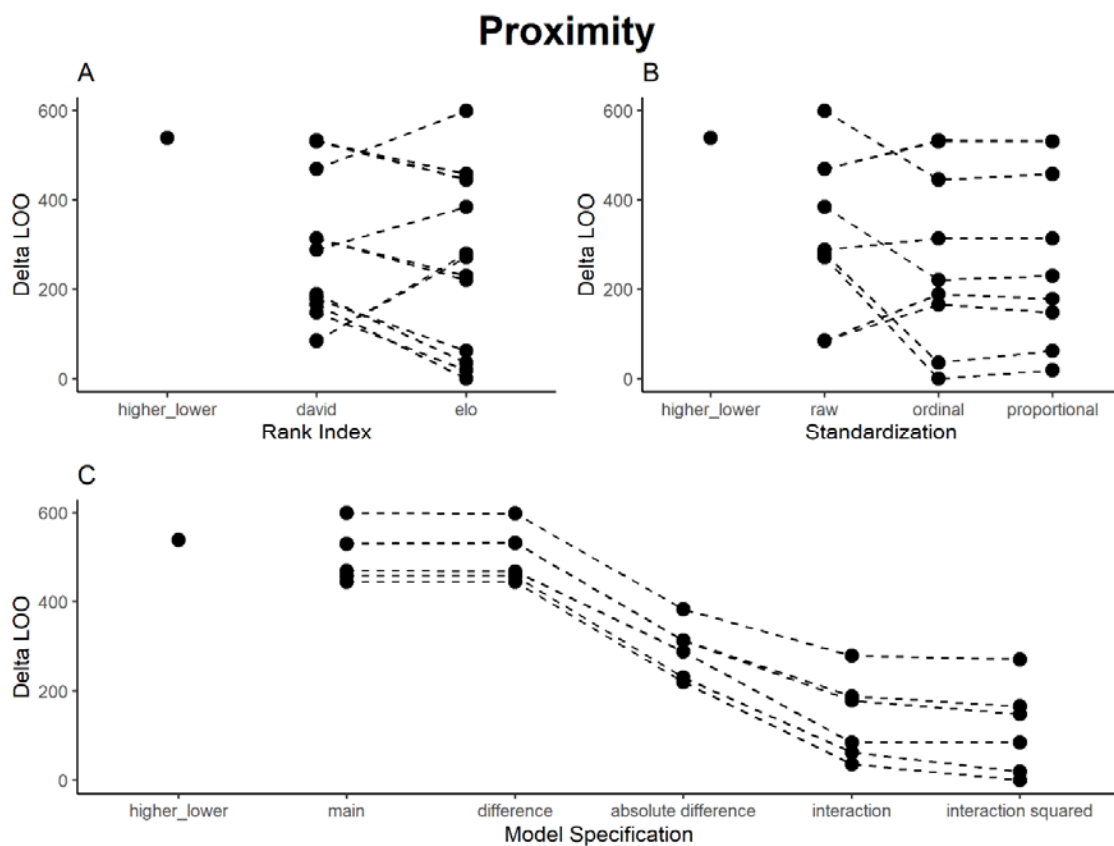

319

320 *Figure 3: Results of model comparison for Proximity interactions. The y-axis portrays delta LOO-ICs (distance to best model)*  
 321 *- the best model is therefore set to 0, and higher scores indicate poorer performance. Points indicate models (split by the*  
 322 *respective category), while lines connect otherwise comparable models (e.g., the main effects ordinal scale models for both*  
 323 *Elo ratings and David's Scores).*

324

325 *Table 4: Interpretation of Elo results for Proximity. Model interpretations are displayed for all models*  
 326 *using Elo ratings (similar results for David's Scores). Downward arrows indicate that lower-ranking*  
 327 *individuals show higher rates, upward arrows indicate that higher-ranking individuals show higher*

328 rates. Interactions can show Down The Hierarchy (DTH; Targeting lower-ranking individuals), Closely-  
 329 Ranked Receiver (CRR; Targeting individuals with similar rank); Up The Hierarchy (UTH; Targeting  
 330 higher-ranking individuals), or a mix of those.

| Model                           | Standardization | DeltaLOOs | Sender Rank | Receiver Rank | Interaction                    |
|---------------------------------|-----------------|-----------|-------------|---------------|--------------------------------|
| <i>Factor Higher-ranking</i>    | -               | 517.5     | ↓           | -             | DTH                            |
| <i>Main Effects</i>             | Raw             | 580.1     | ↑           | ↑             | -                              |
|                                 | Ordinal         | 421.2     | ↓           | ↓             | -                              |
|                                 | Proportional    | 439.0     | ↓           | ↓             | -                              |
| <i>Rank Difference</i>          | Raw             | 579.3     | ↑           | -             | DTH                            |
|                                 | Ordinal         | 424.7     | ↓           | -             | UTH                            |
|                                 | Proportional    | 438.5     | ↓           | -             | UTH                            |
| <i>Absolute Rank Difference</i> | Raw             | 365.1     | ↑           | -             | CRR                            |
|                                 | Ordinal         | 203.3     | ↓           | -             | CRR (stronger for low-ranking) |
|                                 | Proportional    | 211.3     | ↓           | -             | CRR (stronger for low-ranking) |
| <i>Interaction</i>              | Raw             | 260.5     | ↑           | ↑             | CRR                            |
|                                 | Ordinal         | 40.3      | ↓           | ↓             | CRR for low-ranking            |
|                                 | Proportional    | 43.4      | ↓           | ↓             | CRR for low-ranking            |
| <i>Squared Interaction</i>      | Raw             | 251.8     | ↑           | ↑             | CRR                            |
|                                 | Ordinal         | 25.7      | ↓           | ↓             | CRR for low-ranking            |
|                                 | Proportional    | 0         | ↓           | ↓             | CRR for low-ranking            |

331

### 332 *Supplants*

333 For supplants, models using Elo ratings generally performed better than David's Scores (Fig. 4A), and  
 334 raw values performed worse than both ordinal and proportional values (Fig. 4B). However, as in  
 335 aggression, the model with a simple factor denoting that the sender was higher-ranking performed  
 336 best (explained variance:  $R^2 = 0.57$ ) – not surprisingly, given that supplants are used to make the  
 337 dominance hierarchy. Among the other models, those that encode that supplants generally go down  
 338 the hierarchy and differences in patterns across the dominance hierarchy – interactions and squared  
 339 interactions – fared better than the absolute difference, rank difference, and main effects models  
 340 (Fig.4C). The best models (apart from the higher/lower factor model) were the squared interaction  
 341 models of proportional and ordinal David's Scores and Elo ratings. Results closely resembled the

342 aggression models: Main effects, the higher/lower factor, and the rank difference would have  
 343 indicated supplants going down the hierarchy, the absolute rank difference would have indicated  
 344 supplants to those close in rank, and the interaction and squared interaction models captured a mix  
 345 of the two effects (Table 5).

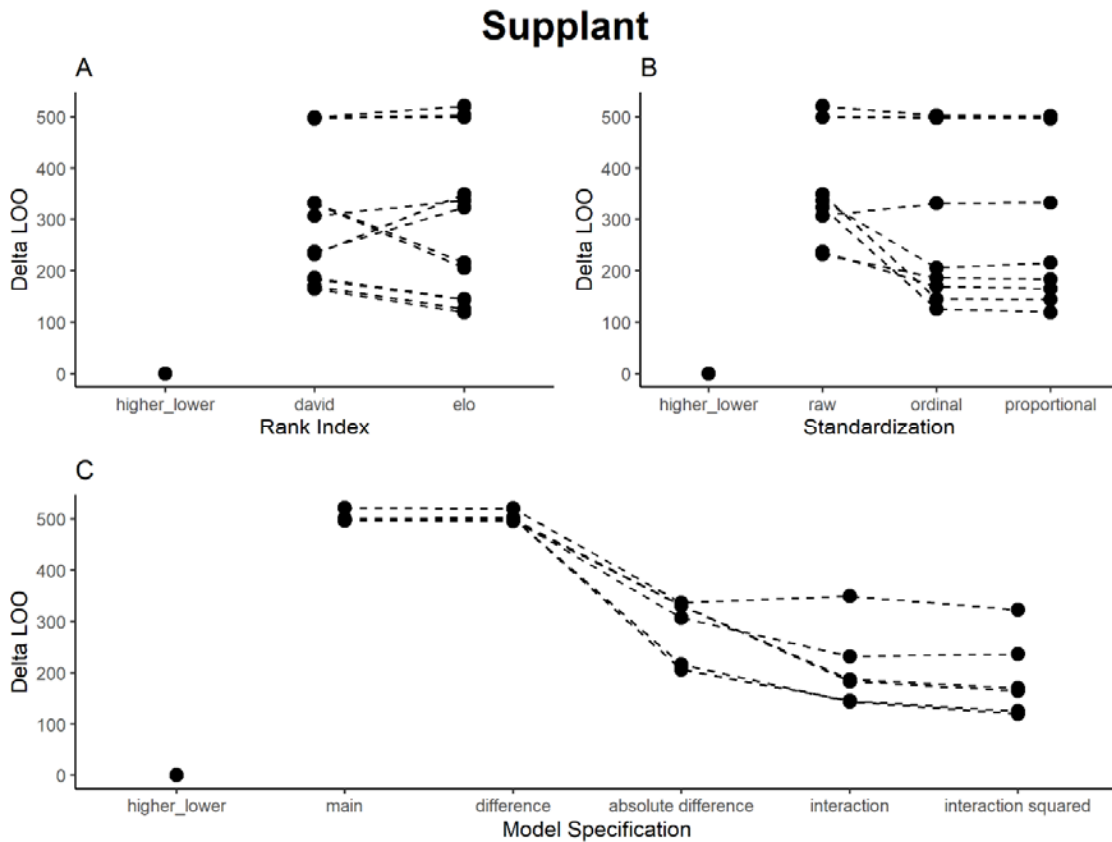

346

347 *Figure 4: Results of model comparison for Supplant interactions. The y-axis portrays delta LOO-ICs (distance to best model) -*  
 348 *the best model is therefore set to 0, and higher scores indicate poorer performance. Points indicate models (split by the*  
 349 *respective category), while lines connect otherwise comparable models (e.g., the main effects ordinal scale models for both*  
 350 *Elo ratings and David's Scores).*

351

352 *Table 5: Interpretation of Elo results for Supplants. Model interpretations are displayed for all models*  
 353 *using Elo ratings (similar results for David's Scores). Downward arrows indicate that lower-ranking*  
 354 *individuals show higher rates, upward arrows indicate that higher-ranking individuals show higher*  
 355 *rates. Interactions can show Down The Hierarchy (DTH; Targeting lower-ranking individuals), Closely-*  
 356 *Ranked Receiver (CRR; Targeting individuals with similar rank); Up The Hierarchy (UTH; Targeting*  
 357 *higher-ranking individuals), or a mix of those.*

| Model | Standardization | DeltaLOO | Sender Rank | Receiver Rank | Interaction |
|-------|-----------------|----------|-------------|---------------|-------------|
|-------|-----------------|----------|-------------|---------------|-------------|

|                                 |              |       |   |   |                                                |
|---------------------------------|--------------|-------|---|---|------------------------------------------------|
| <i>Factor Higher-ranking</i>    | -            | 0     | ↑ | - | DTH                                            |
| <i>Main Effects</i>             | Raw          | 521.4 | - | - | -                                              |
|                                 | Ordinal      | 501.6 | - | ↓ | -                                              |
|                                 | Proportional | 498.8 | ↑ | ↓ | -                                              |
| <i>Rank Difference</i>          | Raw          | 520.9 | - | - | -                                              |
|                                 | Ordinal      | 502.2 | - | - | DTH                                            |
|                                 | Proportional | 501.5 | - | - | DTH                                            |
| <i>Absolute Rank Difference</i> | Raw          | 336.8 | ↑ | - | CRR (especially high-ranking sender)           |
|                                 | Ordinal      | 205.9 | ↑ | - | CRR (especially high-ranking sender)           |
|                                 | Proportional | 216.1 | - | - | CRR (especially high-ranking sender)           |
| <i>Interaction</i>              | Raw          | 349.5 | - | ↓ | High-ranking: CRR and DTH;<br>Low-ranking: CRR |
|                                 | Ordinal      | 145.4 | ↑ | ↓ | High-ranking: CRR and DTH;<br>Low-ranking: CRR |
|                                 | Proportional | 143.9 | ↑ | ↓ | High-ranking: CRR and DTH;<br>Low-ranking: CRR |
| <i>Squared Interaction</i>      | Raw          | 323.1 | ↑ | ↓ | High-ranking: CRR and DTH;<br>Low-ranking: CRR |
|                                 | Ordinal      | 125.5 | ↑ | ↓ | High-ranking: CRR and DTH;<br>Low-ranking: CRR |
|                                 | Proportional | 119.5 | ↑ | ↓ | High-ranking: CRR and DTH;<br>Low-ranking: CRR |

358

359

## 360 Discussion

361 My results showed that the choice of dominance rank index, standardization, and model  
 362 specification matter when interpreting how ranks affect dyadic interaction patterns in primate  
 363 societies. This is true for all models using dominance rank in some form – it becomes even more  
 364 central for dyadic models, which have to capture the interactional nature of animal social life. For all  
 365 interaction types, the results showed that different researchers, using the same data, would have  
 366 reached different interpretations of the social life of sooty mangabeys. Only a handful of studies  
 367 exist for most animal species, comparisons between species are usually indirect, and results across

368 studies are aggregated to make higher-level statements about evolutionary forces underlying  
369 sociality (e.g., socio-ecological models, Koenig et al., 2013). Without sufficient control, there might  
370 be a risk of creating non-replicable results that come to represent what we know about a species  
371 and social evolution more broadly (O’Dea et al., 2021). While I make some of the choices in this  
372 study explicit and show their impact, other researcher choices remained fixed here but certainly  
373 influenced results (such as the exclusion of certain age/sex classes; Fedurek & Lehmann, 2017).

374 Studies of animal sociality and evolution are, at their core, comparative: we study one species with  
375 the goal of understanding underlying evolutionary processes across species. For this, it is vital that  
376 results across studies are comparable (Fraser et al., 2020; Ihle et al., 2017). A positive note of this  
377 study is that, while Elo ratings and David’s scores differed in predictive power, they would have led  
378 to a similar interpretation of results. The same was true for the use of proportional and ordinal  
379 dominance ranks (while using raw values would have led to different results). Thus, at least for  
380 systems with clearly linear hierarchy and sufficient data, these choices might only weakly influence  
381 interpretation. They might however still be relevant in cases where one of them leads to significant  
382 results in a frequentist framework, while the others do not, and researchers select reported models  
383 based on this hidden multiple comparison (Wicherts et al., 2016). More worrisome, I found that  
384 differences in model specification caused considerable differences in results and interpretation.  
385 Most model specifications can only represent one type of relationship. For example, a researcher  
386 using the absolute rank difference would find that all interaction types in sooty mangabeys are  
387 directed at closely ranked group members. A researcher using the simple rank difference would find  
388 that aggression and supplants go down the hierarchy, while grooming goes up the hierarchy, and  
389 would not be able to make meaningful statements about proximity at all. Most likely, these effects  
390 are both present in most systems, but we would class the same social system differently based on  
391 these results.

392 In my comparisons, no combination of index/standardization/model specification outperformed the  
393 others throughout – however, some choices consistently performed worse than others did. Raw Elo  
394 ratings and David’s Scores performed poorly, indicating that the distance between individual values  
395 generated by those scores was not meaningful, with equidistance the most parsimonious  
396 assumption. Main effects and simple rank distance models also performed poorly throughout –  
397 often, these choices had poor predictive accuracy and failed to detect the most likely pattern (based  
398 on models with higher predictive power). The absolute rank distance and higher/lower factor  
399 models performed well for a subset of the models but are limited in the information they could  
400 encode – they will invariably lead to the same, simple interpretation, no matter the underlying data.  
401 The higher/lower factor even ‘found’ a directional pattern in symmetrical proximity data. The  
402 interaction and squared interaction terms were able to detect relatively complex patterns and  
403 performed reasonably well for all interaction types, so if researchers would want to apply one model  
404 specification without previous knowledge of which patterns to expect, interaction terms would be  
405 the best choice. This is largely due to non-linear patterns in interaction distributions, probably arising  
406 out of the interplay of competition and kinship patterns (Seyfarth, 1977). However, it is hard to  
407 interpret (squared) interaction terms unambiguously.

408 Neither Elo ratings nor David’s Scores performed better across the board, and the same was true for  
409 ordinal or proportional values. Often, within the same comparison, some ordinal models performed  
410 better than the proportional models while some performed worse, with no clear pattern explaining  
411 these differences (especially given that the two standardizations correlated more than -0.99). This  
412 highlights the danger of using model comparisons to identify the ‘best predictor’ for any given  
413 distribution (Levy et al., 2020): once we complexify the picture, it soon becomes hard to find  
414 meaningful explanations for the observed patterns, and any additional choice could upend the  
415 interpretation. Recently, studies have interpreted the difference in model performance using  
416 different rank variables or standardizations as a sign that the power structures or individual  
417 decisions within the group make the same assumptions as that index (Levy et al., 2020; Schino &

418 Lasio, 2019). However, these conclusions have to be drawn with care: comparisons between models  
419 indicate which model has lower error in-sample, but they do not provide evidence that either model  
420 is particularly good at representing the social structure or decision-making of a group (Appleby,  
421 1993). Higher predictive accuracy does not allow us to assume causation (McElreath, 2018). For  
422 example, most indices we currently use assume linear hierarchies (Douglas et al., 2017), which is  
423 often not assessed (Schino & Lasio, 2019). We do not, currently, know how much sampling and  
424 measurement errors bias dominance indices and their performance. Most indices and  
425 standardizations are correlated very highly (Vilette et al., 2019), especially when sufficient data are  
426 available and the linearity assumption is fulfilled, so any difference in their performance could be the  
427 result of random variation of few data points. In my models, the higher/lower factor often  
428 performed best, but would entirely fail to predict aggression or supplant patterns within the subset  
429 of dyads where the sender was higher-ranking.

430 For the mangabeys, these results paint a complex picture of the impact of rank on social  
431 interactions. The results are broadly in line with earlier studies for this species (Fruteau et al., 2011;  
432 Mielke et al., 2018, 2020, 2021; Range & Noë, 2002, 2005). My previous use of absolute rank  
433 differences to describe preferred association patterns (Mielke et al., 2020) might have omitted  
434 important information about differences in social behaviour between individuals of different ranks.  
435 In this study, the effect we previously found for female-female association patterns (preferred  
436 spatial association with closely-ranked group members) only held for lower-ranking group members  
437 – possibly because high-ranking females associate more closely with males, which were omitted  
438 here (Mielke et al., 2020). Social interactions (both socio-positive and negative) occurred largely with  
439 closely ranked group members. Aggression and supplants were directed down the hierarchy by high-  
440 ranking group members, while low-ranking individuals groomed up the hierarchy. The grooming  
441 results (strong preference for close rank, more pronounced in high-ranking individuals) are a  
442 replication of earlier results using a different analytical approach (Mielke et al., 2018) and are in line  
443 with some predictions for cercopithecine monkeys with similar social systems (Seyfarth, 1977).

444 However, models including other factors would be necessary to determine whether the preference  
445 for closely ranked individuals is the result of genuine preference for closely-ranked partners,  
446 attraction to kin, reciprocity, spatial proximity, or priority of access.

447 Given that many of the steps taken here are rarely described in detail in ecological studies, and data  
448 and scripts are still mostly unavailable in this field (Culina et al., 2020), we face further challenges to  
449 replicability. One way to counter these problems to replicability would be to report all possible  
450 dominance rank index/standardization/model specification combinations in some form of  
451 ‘multiverse’ analysis (Hoffmann et al., 2021; Steegen et al., 2016). Given that analyses these days are  
452 done using some statistical software, repeating the analyses with all possible combinations does not  
453 in itself pose a computational problem (even though it might dramatically increase computation  
454 times). This approach has the advantage of increasing transparency and making results comparable  
455 across studies because researchers can compare the same model specifications against each other,  
456 rather than different specifications. Interpretation can become more difficult and ambiguous, as I  
457 have shown in this study – at the same time, researchers can demonstrate that the interpretation  
458 they are presenting is not conditional on the choices they made in the data pipeline (O’Dea et al.,  
459 2021). Further developing this framework will be an ongoing process to improve research in ecology  
460 and evolutionary biology (Hoffmann et al., 2021; O’Dea et al., 2021).

461



462 **Funding**

463 This research was supported by the Max Planck Society, the Wenner-Gren Foundation, British  
464 Academy, and Leverhulme Trust. Research at the Tai Chimpanzee Project has been funded by the  
465 Max Planck Society since 1997.

466 **Acknowledgements**

467 The authors thank the Ivorian Ministry of Environment and Forests and Ministry of Higher Education  
468 and Scientific Research and the Office Ivoirien des Parcs et Reserves of Côte d'Ivoire. I thank Simon  
469 Kannieu, Daniel Bouin, Gnimion Florent, and the team of the TCP for field work support and data  
470 collection. Many thanks go to Roman M Wittig and Catherine Crockford for making this research  
471 possible and comments on the manuscript, and to Delphine de Moor for helpful comments.

472

473 **Data Availability**

474 Scripts and Data are available here: <https://github.com/AlexMielke1988/Mielke-Mangabey-Ranks>

475 **References**

- 476 Albers, P. C. H., & de Vries, H. (2001). Elo-rating as a tool in the sequential estimation of dominance  
477 strengths. *Animal Behaviour*, *61*(2), 489–495. <https://doi.org/10.1006/anbe.2000.1571>
- 478 Appleby, M. C. (1993). How animals perceive a hierarchy: Reactions to Freeman et al. *Animal*  
479 *Behaviour*, *46*(6), 1232–1233. <https://doi.org/10.1006/anbe.1993.1316>
- 480 Balasubramaniam, K. N., Berman, C. M., de Marco, A., Dittmar, K., Majolo, B., Ogawa, H., Thierry, B.,  
481 & de Vries, H. (2013). Consistency of dominance rank order: A comparison of David's scores  
482 with I&SI and Bayesian methods in macaques. *American Journal of Primatology*, *75*(9), 959–  
483 971. <https://doi.org/10.1002/ajp.22160>
- 484 Bayly, K. L., Evans, C. S., & Taylor, A. (2006). Measuring social structure: A comparison of eight  
485 dominance indices. *Behavioural Processes*, *73*(1), 1–12.  
486 <https://doi.org/10.1016/j.beproc.2006.01.011>
- 487 Bürkner, P. C. (2018). Advanced Bayesian multilevel modeling with the R package brms. *R Journal*,  
488 *10*(1), 395–411. <https://doi.org/10.32614/rj-2018-017>
- 489 Culina, A., van den Berg, I., Evans, S., & Sánchez-Tójar, A. (2020). Low availability of code in ecology:  
490 A call for urgent action. *PLOS Biology*, *18*(7), e3000763.  
491 <https://doi.org/10.1371/journal.pbio.3000763>
- 492 David, H. A. (1987). Ranking from unbalanced paired-comparison data. *Biometrika*, *74*(2), 432–436.  
493 <https://doi.org/10.1093/biomet/74.2.432>
- 494 De Vries, H., Stevens, J. M. G., & Vervaecke, H. (2006). Measuring and testing the steepness of  
495 dominance hierarchies. *Animal Behaviour*, *71*(3), 585–592.  
496 <https://doi.org/10.1016/j.anbehav.2005.05.015>
- 497 Douglas, P. H., Ngonga Ngomo, A. C., & Hohmann, G. (2017). A novel approach for dominance  
498 assessment in gregarious species: ADAGIO. In *Animal Behaviour* (Vol. 123, pp. 21–32).  
499 Academic Press. <https://doi.org/10.1016/j.anbehav.2016.10.014>
- 500 Drews, C. (1993). The concept and definition of dominance in animal behaviour. *Behaviour*, *125*(3–  
501 4), 283–313. <https://doi.org/10.1163/156853993X00290>
- 502 Dugatkin, L. A., & Earley, R. L. (2004). Individual recognition, dominance hierarchies and winner and  
503 loser effects. *Proceedings of the Royal Society B: Biological Sciences*, *271*(1547), 1537–1540.  
504 <https://doi.org/10.1098/rspb.2004.2777>
- 505 Fedurek, P., & Lehmann, J. (2017). The effect of excluding juveniles on apparent adult olive baboons  
506 (*Papio anubis*) social networks. *PLoS ONE*, *12*(3), e0173146.  
507 <https://doi.org/10.1371/journal.pone.0173146>
- 508 Foerster, S., Franz, M., Murray, C. M., Gilby, I. C., Feldblum, J. T., Walker, K. K., & Pusey, A. E. (2016).  
509 Chimpanzee females queue but males compete for social status. *Scientific Reports*, *6*(1), 1–11.  
510 <https://doi.org/10.1038/srep35404>
- 511 Fraser, H., Barnett, A., Parker, T. H., & Fidler, F. (2020). The role of replication studies in ecology.  
512 *Ecology and Evolution*, *10*(12), 5197–5207. <https://doi.org/10.1002/ece3.6330>

- 513 Fruteau, C., Lemoine, S., Hellard, E., van Damme, E., & Noë, R. (2011). When females trade grooming  
514 for grooming: Testing partner control and partner choice models of cooperation in two primate  
515 species. *Animal Behaviour*, *81*(6), 1223–1230. <https://doi.org/10.1016/j.anbehav.2011.03.008>
- 516 Gammell, M. P., De Vries, H., Jennings, D. J., Carlin, C. M., & Hayden, T. J. (2003). David's score: A  
517 more appropriate dominance ranking method than Clutton-Brock et al.'s index. In *Animal*  
518 *Behaviour* (Vol. 66, Issue 3, pp. 601–605). Academic Press.  
519 <https://doi.org/10.1006/anbe.2003.2226>
- 520 Gba, B. C., Bene, J.-C. K., Gone Bi, Z. B., Mielke, A., & Kone, I. (2019). Within-group spatial position  
521 and activity budget of wild sooty mangabeys (*Cercocebus atys*) in Taï National Park, Côte  
522 d'Ivoire. *International Journal of Biological and Chemical Sciences*, *13*(7), 2991–3008.  
523 <https://doi.org/10.4314/ijbcs.v13i7.2>
- 524 Gelman, A., Goodrich, B., Gabry, J., & Vehtari, A. (2019). R-squared for Bayesian Regression Models.  
525 *American Statistician*, *73*(3), 307–309. <https://doi.org/10.1080/00031305.2018.1549100>
- 526 Goffe, A. S., Fischer, J., & Sennhenn-Reulen, H. (2018). Bayesian inference and simulation  
527 approaches improve the assessment of Elo-ratings in the analysis of social behaviour. *Methods*  
528 *in Ecology and Evolution*, *9*(10), 2131–2144. <https://doi.org/10.1111/2041-210X.13072>
- 529 Goffe, A. S., Zinner, D., & Fischer, J. (2016). Sex and friendship in a multilevel society: behavioural  
530 patterns and associations between female and male Guinea baboons. *Behavioral Ecology and*  
531 *Sociobiology*, *70*(3), 323–336. <https://doi.org/10.1007/s00265-015-2050-6>
- 532 Henzi, S. P., & Barrett, L. (2002). Infants as a commodity in a baboon market. *Animal Behaviour*,  
533 *63*(5), 915–921. <https://doi.org/10.1006/anbe.2001.1986>
- 534 Hoffmann, S., Schönbrodt, F., Elsas, R., Wilson, R., Strasser, U., & Boulesteix, A.-L. (2021). The  
535 multiplicity of analysis strategies jeopardizes replicability: lessons learned across disciplines.  
536 *Royal Society Open Science*, *8*(4), rsos.201925. <https://doi.org/10.1098/rsos.201925>
- 537 Ihle, M., Winney, I. S., Krystalli, A., & Croucher, M. (2017). Striving for transparent and credible  
538 research: Practical guidelines for behavioral ecologists. *Behavioral Ecology*, *28*(2), 348–354.  
539 <https://doi.org/10.1093/beheco/ax003>
- 540 Koenig, A., Scarry, C. J., Wheeler, B. C., & Borries, C. (2013). Variation in grouping patterns, mating  
541 systems and social structure: What socio-ecological models attempt to explain. *Philosophical*  
542 *Transactions of the Royal Society B: Biological Sciences*, *368*(1618).  
543 <https://doi.org/10.1098/rstb.2012.0348>
- 544 Kubenova, B., Konecna, M., Majolo, B., Smilauer, P., Ostner, J., & Schülke, O. (2016). Triadic  
545 awareness predicts partner choice in male-infant-male interactions in Barbary macaques.  
546 *Animal Cognition*, *20*(2), 1–12. <https://doi.org/10.1007/s10071-016-1041-y>
- 547 Leiva, D., & De Vries, H. (2014). *steepness: Testing Steepness of Dominance Hierarchies*. R package  
548 version 0.2-2.
- 549 Levy, E. J., Zippel, M. N., Mclean, E., Campos, F. A., Dasari, M., Fogel, A. S., Franz, M., Gesquiere, L. R.,  
550 Gordon, J. B., Grieneisen, L., Habig, B., Jansen, D. J., Learn, N. H., Weibel, C. J., Altmann, J.,  
551 Alberts, S. C., & Archie, E. A. (2020). A comparison of dominance rank metrics reveals multiple  
552 competitive landscapes in an animal society: Dominance rank & competitive landscapes.

- 553 *Proceedings of the Royal Society B: Biological Sciences*, 287(1934).  
554 <https://doi.org/10.1098/rspb.2020.1013>
- 555 Lonsdorf, T. B., Klingelhöfer-Jens, M., Andreatta, M., Beckers, T., Chalkia, A., Gerlicher, A., Jentsch, V.  
556 L., Drexler, S. M., Mertens, G., Richter, J., Sjouwerman, R., Wendt, J., & Merz, C. J. (2019).  
557 Navigating the garden of forking paths for data exclusions in fear conditioning research. *ELife*,  
558 8. <https://doi.org/10.7554/eLife.52465>
- 559 McElreath, R. (2018). Statistical Rethinking: A Bayesian Course with Examples in R and Stan. In  
560 *Statistical Rethinking: A Bayesian Course with Examples in R and Stan*. Chapman & Hall/CRC.  
561 <https://doi.org/10.1201/9781315372495>
- 562 Mielke, A., Crockford, C., & Wittig, R. M. (2020). Predictability and variability of association patterns  
563 in sooty mangabeys. *Behavioral Ecology and Sociobiology*, 74(4), 1–13.  
564 <https://doi.org/10.1007/s00265-020-2829-y>
- 565 Mielke, A., Preis, A., Samuni, L., Gogarten, J. F., Lester, J. D., Crockford, C., & Wittig, R. M. (2021).  
566 Consistency of Social Interactions in Sooty Mangabeys and Chimpanzees. *Frontiers in Ecology  
567 and Evolution*, 8. <https://doi.org/10.3389/fevo.2020.603677>
- 568 Mielke, A., Preis, A., Samuni, L., Gogarten, J. F., Wittig, R. M., & Crockford, C. (2018). Flexible  
569 decision-making in grooming partner choice in sooty mangabeys and chimpanzees. *Royal  
570 Society Open Science*, 5(7), 172143. <https://doi.org/10.1098/rsos.172143>
- 571 Mielke, A., Samuni, L., Preis, A., Gogarten, J. F., Crockford, C., & Wittig, R. M. (2017). Bystanders  
572 intervene to impede grooming in western chimpanzees and sooty mangabeys. *Royal Society  
573 Open Science*, 4(11), 171296. <https://doi.org/10.1098/rsos.171296>
- 574 Netto, W. J., Hanegraaf, P. L. H., & De Vries, H. (1993). Matman: a Program for the Analysis of  
575 Sociometric Matrices and Behavioural Transition Matrices. *Behaviour*, 125(3–4), 157–175.  
576 <https://doi.org/10.1163/156853993x00218>
- 577 Neumann, C., Duboscq, J., Dubuc, C., Ginting, A., Irwan, A. M., Agil, M., Widdig, A., & Engelhardt, A.  
578 (2011). Assessing dominance hierarchies: Validation and advantages of progressive evaluation  
579 with Elo-rating. *Animal Behaviour*, 82(4), 911–921.  
580 <https://doi.org/10.1016/j.anbehav.2011.07.016>
- 581 Newton-Fisher, N. E. (2017). Modeling Social Dominance: Elo-Ratings, Prior History, and the Intensity  
582 of Aggression. *International Journal of Primatology*, 38(3), 427–447.  
583 <https://doi.org/10.1007/s10764-017-9952-2>
- 584 O’Dea, R. E., Parker, T. H., Chee, Y. E., Culina, A., Drobnik, S. M., Duncan, D. H., Fidler, F., Gould, E.,  
585 Ihle, M., Kelly, C. D., Lagisz, M., Roche, D. G., Sánchez-Tójar, A., Wilkinson, D. P., Wintle, B. C., &  
586 Nakagawa, S. (2021). Towards open, reliable, and transparent ecology and evolutionary  
587 biology. *BMC Biology*, 19(1), 68. <https://doi.org/10.1186/s12915-021-01006-3>
- 588 R Development Core Team, & R Core Team. (2020). R: A language and environment for statistical  
589 computing. *R Foundation for Statistical Computing Vienna Austria, 0*, {ISBN} 3-900051-07-0.  
590 <https://doi.org/10.1038/sj.hdy.6800737>
- 591 Range, F., & Noë, R. (2002). Familiarity and dominance relations among female sooty mangabeys in  
592 the Tai National Park. *American Journal of Primatology*, 56(3), 137–153.  
593 <https://doi.org/10.1002/ajp.1070>

- 594 Range, F., & Noë, R. (2005). Can simple rules account for the pattern of triadic interactions in  
595 juvenile and adult female sooty mangabeys? *Animal Behaviour*, *69*(2), 445–452.  
596 <https://doi.org/10.1016/j.anbehav.2004.02.025>
- 597 Rosati, A. G., Hagberg, L., Enigk, D. K., Otali, E., Thompson, M. E., Martin, N. M., Wrangham, R. W., &  
598 Machanda, Z. P. (2020). Social selectivity in aging wild chimpanzees. *Science*, *370*(6515), 473–  
599 476. <https://doi.org/10.1126/science.aaz9129>
- 600 Sánchez-Tójar, A., Schroeder, J., & Farine, D. R. (2018). A practical guide for inferring reliable  
601 dominance hierarchies and estimating their uncertainty. *Journal of Animal Ecology*, *87*(3), 594–  
602 608. <https://doi.org/10.1111/1365-2656.12776>
- 603 Schielzeth, H. (2010). Simple means to improve the interpretability of regression coefficients.  
604 *Methods in Ecology and Evolution*, *1*(2), 103–113. <https://doi.org/10.1111/j.2041->  
605 [210x.2010.00012.x](https://doi.org/10.1111/j.2041-210x.2010.00012.x)
- 606 Schino, G., & Lasio, F. (2019). Mandrills represent their own dominance hierarchy on a cardinal, not  
607 ordinal, scale. *Animal Cognition*, *22*(6), 1159–1169. <https://doi.org/10.1007/s10071-019->  
608 [01308-8](https://doi.org/10.1007/s10071-019-01308-8)
- 609 Seyfarth, R. M. (1977). A model of social grooming among adult female monkeys. *Journal of*  
610 *Theoretical Biology*, *65*(4), 671–698. [https://doi.org/10.1016/0022-5193\(77\)90015-7](https://doi.org/10.1016/0022-5193(77)90015-7)
- 611 Silk, J. B. (1999). Why are infants so attractive to others? The form and function of infant handling in  
612 bonnet macaques. *Animal Behaviour*, *57*(5), 1021–1032.  
613 <https://doi.org/10.1006/anbe.1998.1065>
- 614 Steegen, S., Tuerlinckx, F., Gelman, A., & Vanpaemel, W. (2016). Increasing Transparency Through a  
615 Multiverse Analysis. *Perspectives on Psychological Science*, *11*(5), 702–712.  
616 <https://doi.org/10.1177/1745691616658637>
- 617 Vehtari, A., Gelman, A., & Gabry, J. (2017). Practical Bayesian model evaluation using leave-one-out  
618 cross-validation and WAIC. *Statistics and Computing*, *27*(5), 1413–1432.  
619 <https://doi.org/10.1007/S11222-016-9696-4/FIGURES/12>
- 620 Vilette, C., Bonnell, T. R., Henzi, S. P., & Barrett, L. (2019). Determining Temporal Stability in  
621 Dominance Hierarchies. In *bioRxiv*. <https://doi.org/10.1101/692384>
- 622 Wicherts, J. M., Veldkamp, C. L. S., Augusteyn, H. E. M., Bakker, M., van Aert, R. C. M., & van Assen,  
623 M. A. L. M. (2016). Degrees of Freedom in Planning, Running, Analyzing, and Reporting  
624 Psychological Studies: A Checklist to Avoid p-Hacking. *Frontiers in Psychology*, *7*, 1832.  
625 <https://doi.org/10.3389/fpsyg.2016.01832>
- 626
